# Supplementary material for: Role of JAK-STAT Pathway in Broiler Chicks Fed with Chestnut Tannins
Source: MDPI journal article supplement (doi:10.3390/ani11020337), 2021-01-29

## SUPPLEMENTARY MATERIALS:

**Figure S1.** Calculated composition of corn/soy starter diets. The total basal diet contained 1,365 kcal/lb.

| Ingredients                       | %            |
|-----------------------------------|--------------|
| Corn                              | 59.81        |
| SBM 48%                           | 33.84        |
| Monocalcium phosphate 21          | 1.56         |
| Soy oil                           | 2.09         |
| Choline chloride                  | 0.10         |
| Limestone                         | 1.56         |
| Salt                              | 0.33         |
| L-lysine HCL                      | 0.19         |
| DL-methionine                     | 0.28         |
| Vitamin premix                    | 0.13         |
| Mineral premix                    | 0.05         |
| L-Threonine                       | 0.05         |
| <b>Calculated nutrients, %</b>    | <b>99.99</b> |
| Protein                           | 22.00        |
| Calcium                           | 0.90         |
| Available phosphorus              | 0.45         |
| AMEn (Kcal/lb)                    | 1,365.00     |
| Digestible methionine             | 0.59         |
| Digestible total sulfa amino acid | 0.88         |
| Digestible threonine              | 0.77         |
| Digestible lysine                 | 1.18         |
| Choline                           | 1,256.87     |
| Sodium                            | 0.16         |
| Potassium                         | 0.84         |
| Chloride                          | 0.20         |

**Figure S2A-C.** STRING-db network of interactions. Purple circles indicate the JAK-STAT peptides affiliated to the pathway; the other colors indicate regulatory pathways affecting the JAK-STAT pathway: (A) Protein-protein interactions between proteins included in the day 4 chicken immune peptide array and metabolic peptide array; (B) Protein-protein interactions between proteins included in the day 6 chicken immune peptide array and metabolic peptide array; (C) Protein-protein interactions between proteins included in the day 10 chicken immune peptide array and metabolic peptide array





[illegible]

**Figure S3A-C.** mRNA expression of cecal mRNA from experimental chicks fed 1% ChT inclusion diet, determined by quantitative RT-PCR. (A) Day 4 fold changes by cytokines tested comparing averaged 1% ChT inclusion group with control group; (B) Day 6 fold changes by cytokines tested comparing averaged 1% ChT inclusion group with control group; (C) Day 10 fold changes by cytokines tested comparing averaged 1% ChT inclusion group with control group. Data represent the median values from two separate experiments. \* = significantly different from the controls ( $p \leq 0.05$ ).

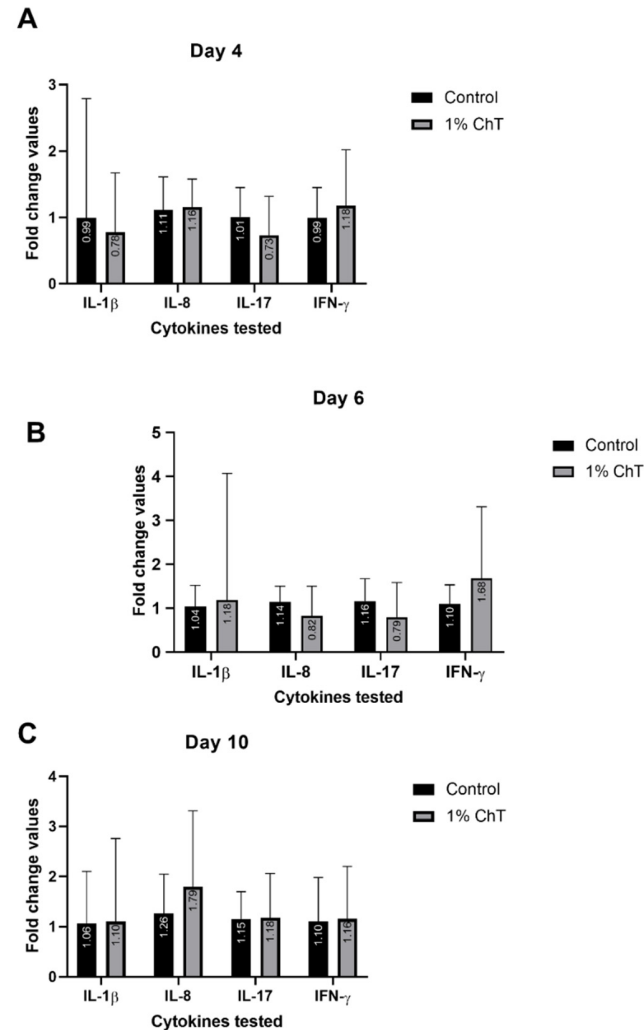

**Figure S4.** The phosphorylation of STAT proteins activates the initiation of gene transcription. The black arrows indicate phosphorylation, and the red arrow indicates inhibitory action.

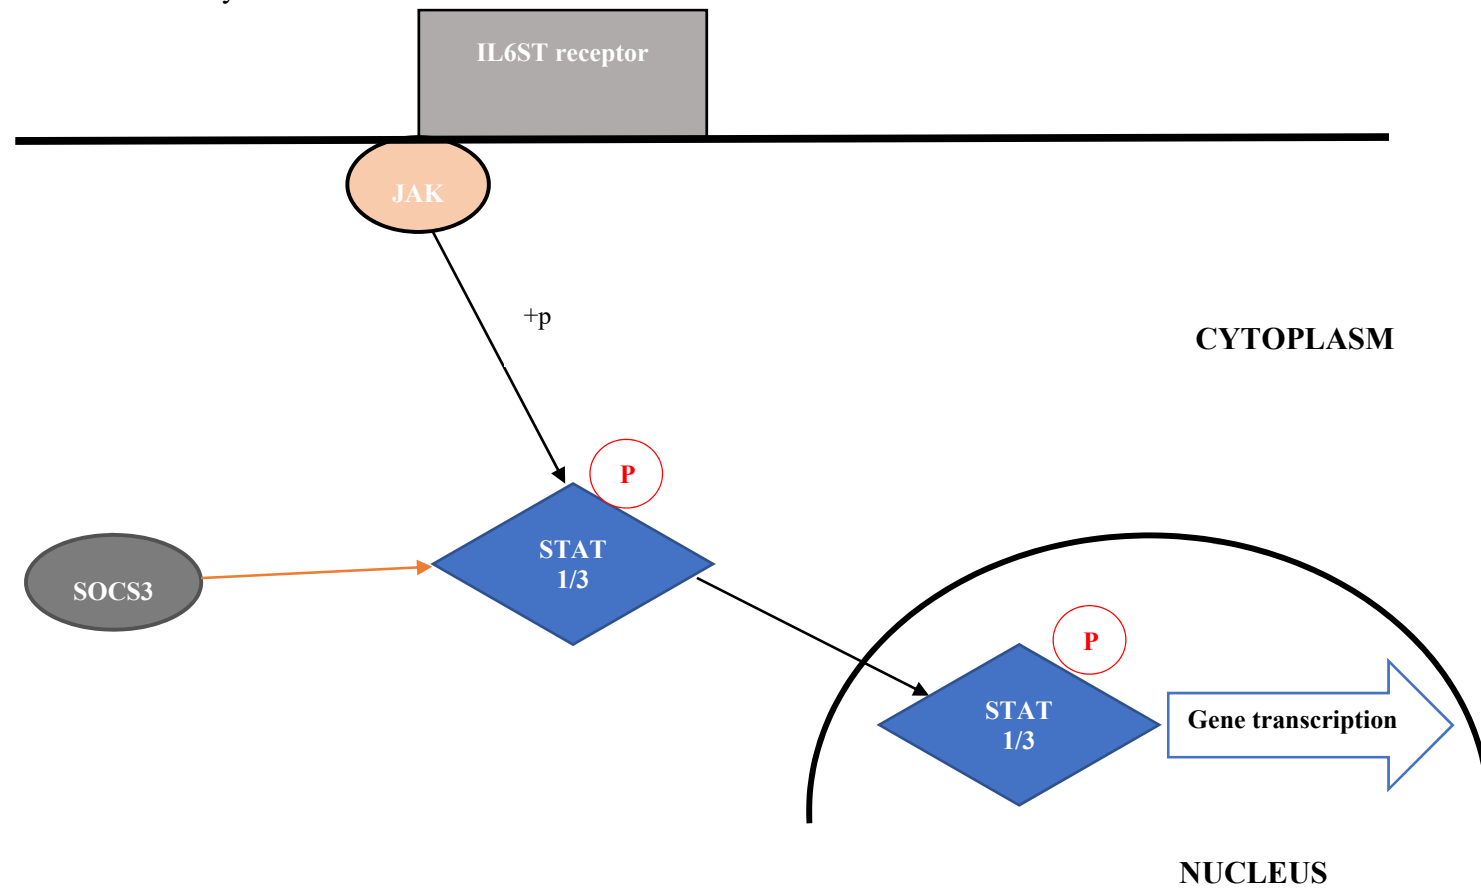

Supplement: s1 [file s1]
